# Supplementary material
Source: MDPI journal article supplement (https://www.mdpi.com/2072-4292/13/4/813)
Supplement: s1 [file s1]

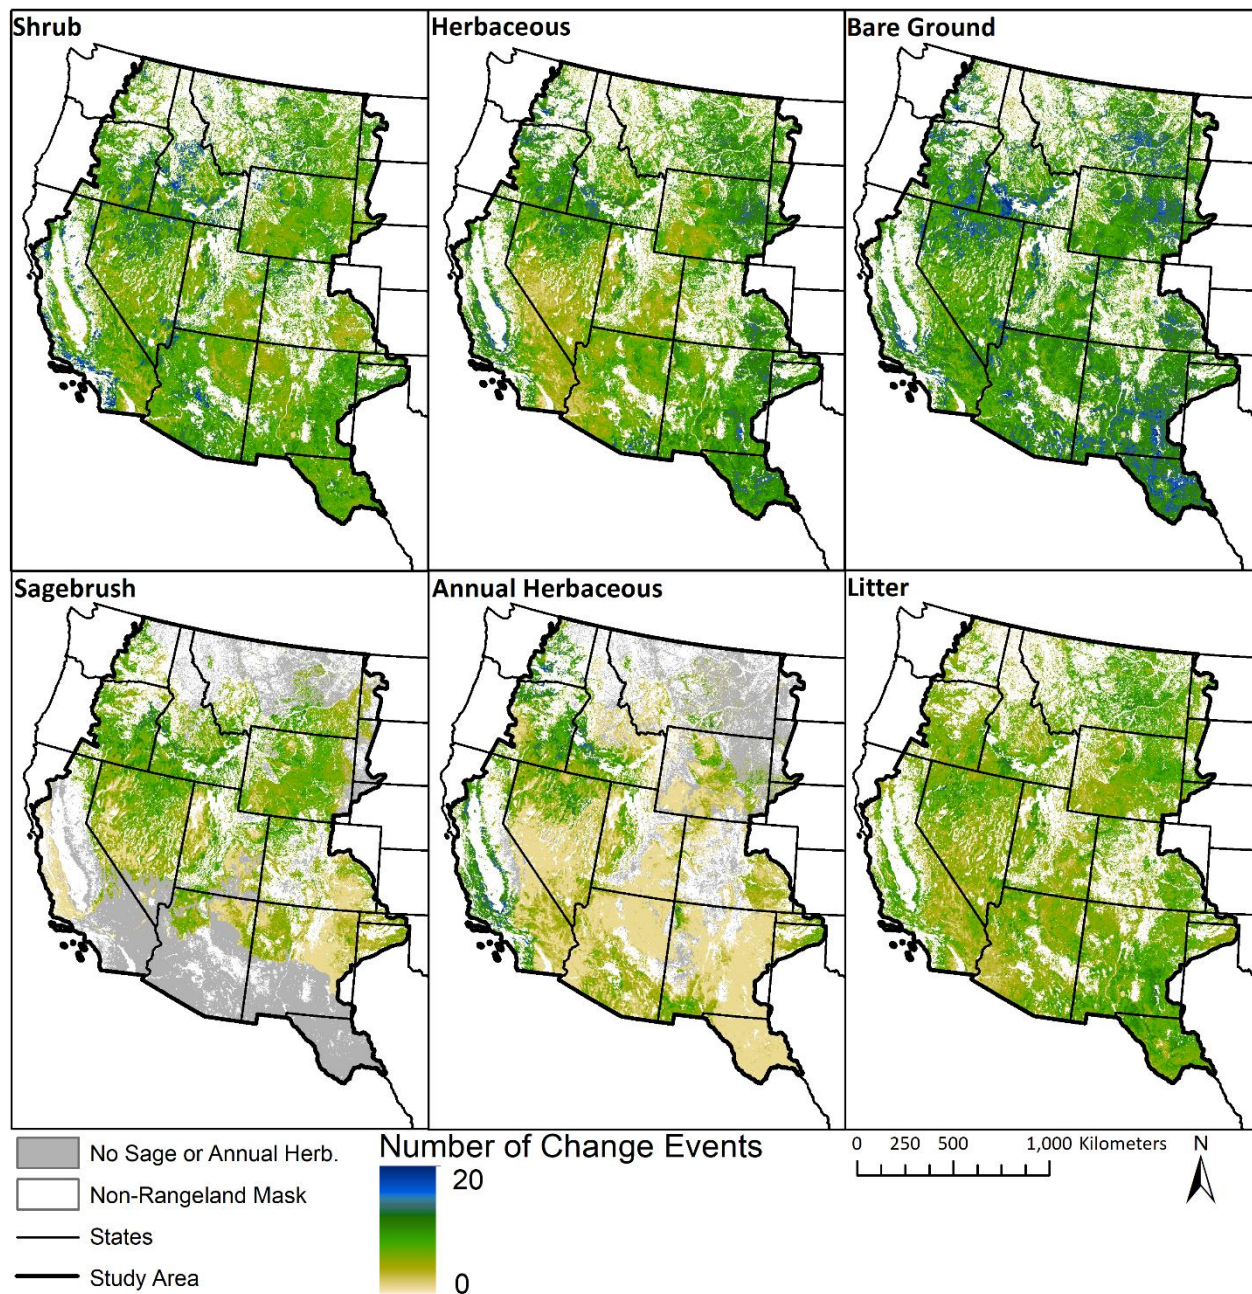

**Supplement 1.** Number of component change events per pixel over the 33-year time-series. Inset figures are the proportion of the study area (y-axis) by number of component change events (on the x-axis) for each component. Note that the y-axis varies among the inset figures by component.

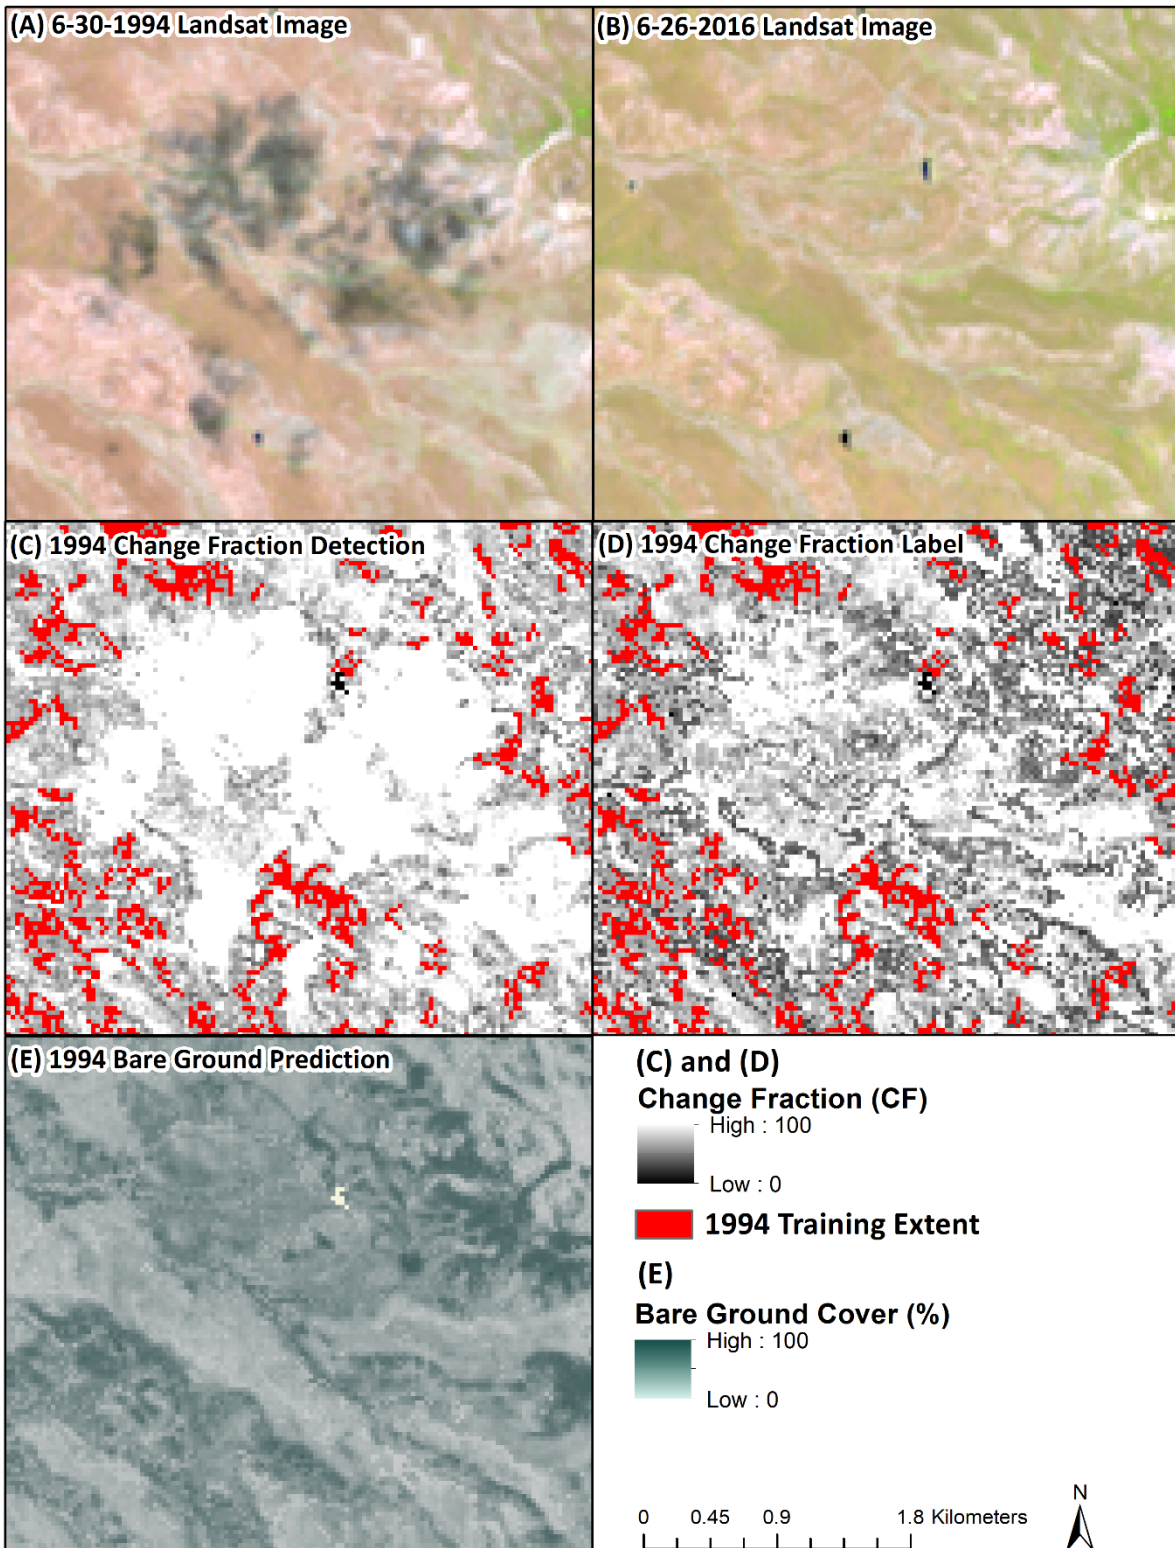

**Supplement 2.** Utility of two levels of Change Fraction (CF) data, example in southwest Wyoming. Summer 1994 (target year) image with cloud and shadow/haze cover not captured by the Quality

Assessment (QA) bands (A) and summer 2016 (base year) image. We produced two levels of CF data, a more aggressive version  $CF_{\text{detect}}$  to detect change and exclude pixels from the training data pool (C) and a second  $CF_{\text{label}}$  to label changed pixels relative to the base year (D). In C and D, pixels included in the training data pool are shown in red. Higher CF values indicate higher confidence a pixel changed between the target and base year. Resulting bare ground prediction for 1994 (E) shows no influence of the cloud or shadow cover.
